# Supplementary material
Source: HighWire-hosted journal article supplement (https://advances.sciencemag.org/content/suppl/2017/04/24/3.4.e1601365)
Supplement: 1601365_SM.pdf [file 1601365_SM.pdf]

## Supplementary Materials for

### **Arctic greening from warming promotes declines in caribou populations**

Per Fauchald, Taejin Park, Hans Tømmervik, Ranga Myneni, Vera Helene Hausner

Published 26 April 2017, *Sci. Adv.* **3**, e1601365 (2017)

DOI: 10.1126/sciadv.1601365

#### **This PDF file includes:**

- table S1. Linear time trends in climate (1979–2014) and NDVI variables (1982–2011).
- table S2. Data set of migratory tundra caribou in North America.
- table S3. Correlation matrices of variables used in SE models of caribou, climate, and NDVI.

**table S1. Linear time trends in climate (1979–2014) and NDVI variables (1982–2011).**

Pearson's correlation coefficient are given for each caribou herd range (three letter code) and for all ranges combined (Total).

| Herd  | May Temp | Jun-Aug Temp | Sea ice conc. | Snow melt | Snow cover | May NDVI | Jun-Aug NDVI |
|-------|----------|--------------|---------------|-----------|------------|----------|--------------|
| WAH   | 0.16     | 0.20         | -0.79         | -0.45     | -0.52      | -0.12    | 0.73         |
| TCH   | 0.13     | 0.11         | -0.78         | -0.48     | -0.48      | -0.07    | 0.81         |
| CAH   | 0.11     | -0.15        | -0.74         | -0.46     | -0.33      | -0.03    | 0.87         |
| PCH   | 0.16     | -0.09        | -0.71         | -0.50     | -0.44      | 0.08     | 0.89         |
| CBH   | 0.23     | 0.10         | -0.61         | -0.24     | -0.40      | -0.27    | 0.76         |
| BLW   | 0.22     | 0.12         | -0.58         | -0.60     | -0.26      | -0.01    | 0.83         |
| BAT   | 0.00     | 0.23         | -0.68         | -0.36     | 0.13       | -0.05    | 0.61         |
| BEV   | -0.13    | 0.28         | -0.75         | -0.24     | 0.10       | -0.24    | 0.62         |
| QAM   | -0.11    | 0.36         | -0.72         | -0.31     | -0.10      | -0.20    | 0.55         |
| LRH   | 0.16     | 0.52         | -0.66         | -0.35     | -0.54      | -0.03    | 0.50         |
| GRH   | 0.22     | 0.56         | -0.59         | -0.22     | -0.50      | -0.08    | 0.49         |
| Total | 0.10     | 0.20         | -0.69         | -0.38     | -0.30      | -0.09    | 0.70         |

**table S2. Data set of migratory tundra caribou in North America.** References are given as notes to the table.

| Herd code | Herd name                   | Data period | No. censuses | References        |
|-----------|-----------------------------|-------------|--------------|-------------------|
| WAH       | Western Arctic Herd         | 1970-2013   | 16           | 1,2               |
| TCH       | Teshekpuk Lake Caribou Herd | 1978-2013   | 11           | 1,3               |
| CAH       | Central Arctic caribou Herd | 1978-2010   | 11           | 1,3               |
| PCH       | Porcupine Caribou Herd      | 1961-2013   | 13           | 1,5               |
| CBH       | Cape Bathurst Herd          | 1986-2012   | 8            | 6                 |
| BLW       | Bluenose-West herd          | 1986-2012   | 8            | 6                 |
| BAT       | Bathurst Herd               | 1977-2012   | 12           | 7,8,9,10,11       |
| BEV       | Beverly Herd                | 1967-2011   | 8            | 12                |
| QAM       | Qamanirjuaq Herd            | 1968-2008   | 9            | 13                |
| LRH       | Leaf River Herd             | 1975-2014   | 7            | 14,15             |
| GRH       | George River Herd           | 1954-2014   | 11           | 14,16,17,18,19,20 |

1. Harper P (editor) et al. (2013) Caribou management report of survey-inventory activities 1 July 2010–30 June 2012. Alaska Department of Fish and Game, Species Management Report ADF&G/DWC/SMR-2013-3, Juneau.
2. WACHWG (2011) Western Arctic Caribou Herd Cooperative Management Plan - Revised December 2011. Western Arctic Caribou Herd Working Group. Nome, Alaska.
3. CARMA 2016. CircumArctic Rangifer Monitoring and Assessment Network. <http://carma.caff.is/>.
4. ADFG (2014) Four North Slope Caribou Herds Counted. Behind the Numbers: How Are the Caribou? Alaska Fish & Wildlife News August 2014. Alaska Department of Fish & Game. [http://www.adfg.alaska.gov/index.cfm?adfg=wildlifeneews.view\\_article&articles\\_id=678](http://www.adfg.alaska.gov/index.cfm?adfg=wildlifeneews.view_article&articles_id=678)
5. PCTC (2014) Porcupine Caribou Annual Summary Report 2014. Prepared for the Porcupine Caribou Management Board. Porcupine Caribou Technical Committee.
6. GNWT 2014. Technical Report on the Cape Bathurst, Bluenose-West, and Bluenose-East Barren-Ground Caribou Herds. Companion Report to Taking Care of Caribou: The Cape Bathurst, Bluenose-West, and Bluenose-East Barren-Ground Caribou Herds Management Plan. Government of Northwest Territories.
7. Case R, Buckland L, Williams L. 1996. The status and trend of the Bathurst caribou herd, Northwest Territories, Canada. Department of Renewable Resources, Government of Northwest Territories, Yellowknife NWT. File Report No. 116.
8. Gunn A, Dragon J, Nishi J. 1997. Bathurst Calving Ground Survey 1996. Department of Wildlife and Economic Development, Government of Northwest Territories, Yellowknife NWT. File Report No. 119.
9. Gunn A, Nishi J, Boulanger J, Williams J. 2005. An estimate of breeding females in the Bathurst herd of barren-ground caribou, June 2003. Department of Environment and Natural Resources Government of the Northwest Territories. Manuscript Report No. 164.
10. Adamczewski J, Boulanger J, Croft B, Cluff D, Elkin B, Nishi J, Kelly A, D'Hont A, Nicolson C. 2009. Decline in the Bathurst caribou herd 2006-2009: a technical evaluation of field data and modeling. Department of Environment and Natural Resources, Government of the Northwest Territories. Yellowknife, NT. Draft (17 December, 2009).
11. Boulanger J, Croft B, Adamczewski J. 2014. An estimate of breeding females and analyses of demographics for the Bathurst herd of barren-ground caribou: 2012 calving ground photographic survey. Environment and Natural Resources, Government of Northwest Territories. File Report No. 142.
12. Campbell M, Boulanger J, Lee DS, Dumond M, McPherson J. 2012. Calving ground abundance estimates of the Beverly and Ahiak subpopulations of barren-ground caribou (*Rangifer tarandus groenlandicus*) – June 2011. Government of Nunavut, Department of Environment. Technical Report Series No. 03-2012.
13. Campbell M, Nishi J, Boulanger J. 2010. A calving ground photo survey of the Qamanirjuaq migratory barren-ground caribou (*Rangifer tarandus groenlandicus*) population – June 2008. Government of Nunavut, Department of Environment. Technical Report Series 2010 No. 1-10.

14. Couturier S, Jean D, Otto R, Rivard S. 2004. Demography of the migratory tundra caribou (*Rangifer tarandus*) of the Nord-du-Québec region and Labrador. Ministère des Ressources naturelles, de la Faune et des Parcs, Direction de l'aménagement de la faune du Nord-du-Québec and Direction de la recherche sur la faune. Québec, QC.
15. GQ 2015. Migratory caribou hunting in Northern Québec - Hunting measures for the 2015-2016 season. Press Release, Ministère des Forêts, de la Faune et des Parcs, Gouvernement du Québec, 2015. <http://www.fil-information.gouv.qc.ca/Pages/Article.aspx?aiguillage=ajd&type=1&lang=en&idArticle=2302064405>
16. Messier F, Huot J, Henaff DL, Luttich S. 1988. Demography of the George River Caribou Herd: evidence of population regulation by forage exploitation and range expansion. *Arctic* 41:279-287.
17. Couturier S, Brunelle J, Vandal D, St-Martin G. 1990. Changes in the population dynamics of the George River Caribou Herd, 1976-87. *Arctic* 43:9-20.
18. Couturier S, Courtois R, Crépeau H, Rivest LP, Luttich S. 1996. Calving photocensus of the Rivière George Caribou Herd and comparison with an independent census. *Rangifer Special Issue* 9:283-296.
19. Gunn A, Russell D, Eamer J. 2011. Northern caribou population trends in Canada. *Canadian Biodiversity: Ecosystem Status and Trends 2010*, Technical Thematic Report No. 10. Canadian Councils of Resource Ministers. Ottawa, ON.
20. GNL 2014. Provincial Government Provides Update on George River Caribou Herd. News release Government of Newfoundland and Labrador, Department of Environment and Conservation, August 14, 2014. <http://www.releases.gov.nl.ca/releases/2014/env/0814n04.aspx>.

**table S3. Correlation matrices of variables used in SE models of caribou, climate, and NDVI.**

|                       | Population growth | Population size | May NDVI | June-August NDVI | May Temperature | June-August Temperature | Sea ice concentration | Annual snow cover | Date of snowmelt |
|-----------------------|-------------------|-----------------|----------|------------------|-----------------|-------------------------|-----------------------|-------------------|------------------|
| Time lag = 0, N = 81  |                   |                 |          |                  |                 |                         |                       |                   |                  |
| Population growth     | 1                 |                 |          |                  |                 |                         |                       |                   |                  |
| Population size       | -0.18             | 1               |          |                  |                 |                         |                       |                   |                  |
| May NDVI              | -0.05             | 0.32            | 1        |                  |                 |                         |                       |                   |                  |
| Jun-Aug NDVI          | -0.50             | 0.10            | 0.09     | 1                |                 |                         |                       |                   |                  |
| May Temp              | -0.15             | 0.06            | 0.30     | 0.16             | 1               |                         |                       |                   |                  |
| Jun-Aug Temp          | -0.20             | 0.19            | 0.11     | 0.21             | 0.31            | 1                       |                       |                   |                  |
| Sea ice concentration | 0.48              | -0.07           | 0.21     | -0.77            | -0.31           | -0.43                   | 1                     |                   |                  |
| Snow cover            | -0.04             | -0.07           | 0.20     | -0.26            | -0.46           | -0.46                   | 0.55                  | 1                 |                  |
| Date of snowmelt      | 0.04              | -0.12           | 0.19     | -0.37            | -0.19           | -0.34                   | 0.55                  | 0.70              | 1                |
| Time lag = 1, N = 78  |                   |                 |          |                  |                 |                         |                       |                   |                  |
| Population growth     | 1                 |                 |          |                  |                 |                         |                       |                   |                  |
| Population size       | -0.08             | 1               |          |                  |                 |                         |                       |                   |                  |
| May NDVI              | 0.07              | 0.27            | 1        |                  |                 |                         |                       |                   |                  |
| Jun-Aug NDVI          | -0.48             | 0.01            | 0.13     | 1                |                 |                         |                       |                   |                  |
| May Temp              | 0.07              | 0.07            | 0.31     | -0.01            | 1               |                         |                       |                   |                  |
| Jun-Aug Temp          | -0.34             | 0.02            | 0.05     | 0.32             | 0.15            | 1                       |                       |                   |                  |
| Sea ice concentration | 0.37              | -0.04           | 0.25     | -0.73            | -0.20           | -0.41                   | 1                     |                   |                  |
| Snow cover            | -0.09             | -0.05           | 0.09     | -0.27            | -0.46           | -0.24                   | 0.52                  | 1                 |                  |
| Date of snowmelt      | 0.00              | -0.02           | 0.07     | -0.36            | -0.27           | -0.26                   | 0.56                  | 0.71              | 1                |
| Time lag = 2, N = 74  |                   |                 |          |                  |                 |                         |                       |                   |                  |
| Population growth     | 1                 |                 |          |                  |                 |                         |                       |                   |                  |
| Population size       | 0.00              | 1               |          |                  |                 |                         |                       |                   |                  |
| May NDVI              | -0.03             | 0.24            | 1        |                  |                 |                         |                       |                   |                  |
| Jun-Aug NDVI          | -0.46             | -0.08           | 0.15     | 1                |                 |                         |                       |                   |                  |
| May Temp              | -0.09             | 0.13            | 0.44     | 0.02             | 1               |                         |                       |                   |                  |
| Jun-Aug Temp          | -0.28             | 0.09            | 0.09     | 0.19             | 0.41            | 1                       |                       |                   |                  |
| Sea ice concentration | 0.30              | 0.06            | 0.23     | -0.69            | -0.13           | -0.41                   | 1                     |                   |                  |
| Snow cover            | -0.03             | -0.14           | 0.05     | -0.10            | -0.47           | -0.36                   | 0.37                  | 1                 |                  |
| Date of snowmelt      | 0.06              | 0.02            | -0.07    | -0.21            | -0.30           | -0.31                   | 0.39                  | 0.69              | 1                |
| Time lag = 3, N = 72  |                   |                 |          |                  |                 |                         |                       |                   |                  |
| Population growth     | 1                 |                 |          |                  |                 |                         |                       |                   |                  |
| Population size       | 0.02              | 1               |          |                  |                 |                         |                       |                   |                  |
| May NDVI              | -0.03             | 0.11            | 1        |                  |                 |                         |                       |                   |                  |
| Jun-Aug NDVI          | -0.39             | -0.21           | 0.22     | 1                |                 |                         |                       |                   |                  |
| May Temp              | -0.12             | -0.01           | 0.38     | 0.17             | 1               |                         |                       |                   |                  |
| Jun-Aug Temp          | -0.18             | 0.11            | 0.10     | 0.15             | 0.18            | 1                       |                       |                   |                  |
| Sea ice concentration | 0.30              | 0.07            | 0.03     | -0.74            | -0.34           | -0.37                   | 1                     |                   |                  |
| Snow cover            | -0.04             | -0.14           | 0.10     | -0.07            | -0.44           | -0.34                   | 0.42                  | 1                 |                  |
| Date of snowmelt      | 0.05              | -0.05           | -0.09    | -0.19            | -0.28           | -0.24                   | 0.40                  | 0.53              | 1                |
